# Supplementary material
Source: Springer Nature journal article supplement (https://www.springermedizin.de/resource/supplementary/12967_2011_831_MOESM5_ESM.pdf/9577132)

HE

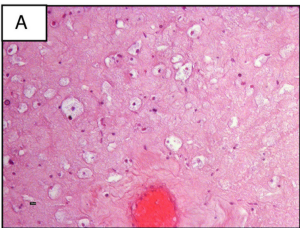

SCGF

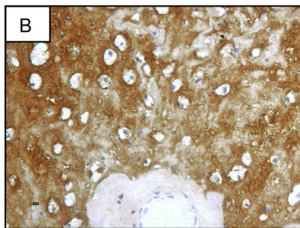

KIT

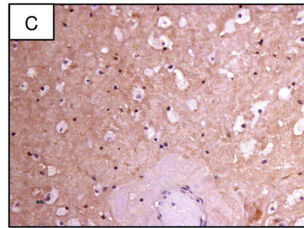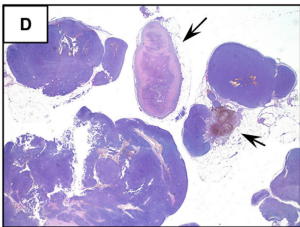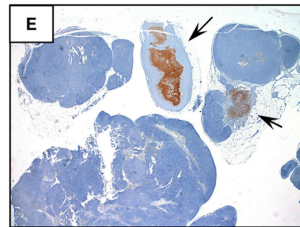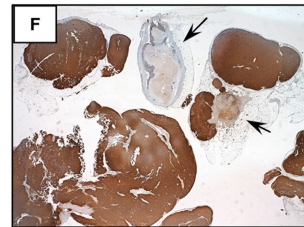

Supplement: MOESM5 [file 9577132]
